# Supplementary material for: Thiomolybdate [Mo3S13]2−nanocluster: a molecular mimic of MoS2active sites for highly efficient photocatalytic hydrogen evolution
Source: Royal Society of Chemistry journal article supplement (doi:10.1039/c7cc08178b), 2017-12-12
Supplement: c7cc08178b1.pdf [file c7cc08178b1.pdf]

## Electronic Supplementary Information

### **Thiomolybdate [Mo<sub>3</sub>S<sub>13</sub>]<sup>2-</sup> Nanocluster: A Molecular Mimic of MoS<sub>2</sub> Active Sites for Highly Efficient Photocatalytic Hydrogen Evolution**

Yonggang Lei,<sup>a</sup> Meiqun Yang,<sup>a</sup> Jianhua Hou,<sup>a</sup> Fang Wang,<sup>a</sup> Entian Cui,<sup>b</sup> Chao Kong<sup>c</sup>  
and Shixiong Min<sup>\*a</sup>

<sup>a</sup> *School of Chemistry and Chemical Engineering, North Minzu University, Yinchuan, 750021, Ningxia Province, People's Republic of China.*

<sup>b</sup> *Key Laboratory for Advanced Technology in Environmental Protection of Jiangsu Province, Yancheng Institute of Technology, Yancheng, 224051, People's Republic of China.*

*School of Chemistry & Chemical Engineering, Longdong University, Qingyang 745000, People's Republic of China.*

*\*corresponding author: E-mail: [sxmin@nun.edu.cn](mailto:sxmin@nun.edu.cn).*

## 1. Experimental section

### 1.1 Synthesis

#### [Mo<sub>3</sub>S<sub>13</sub>]<sup>2-</sup> nanoclusters

The thiomolybdate (NH<sub>4</sub>)<sub>2</sub>Mo<sub>3</sub>S<sub>13</sub>·xH<sub>2</sub>O (x=0-2) was prepared by the method outlined by Müller et al. briefly, 4.0 g of (NH<sub>4</sub>)<sub>6</sub>Mo<sub>7</sub>O<sub>24</sub>·4H<sub>2</sub>O was dissolved in 20 mL of water in an Erlenmeyer flask. An ammonium polysulfide solution (120 ml, 25 wt%) was added and the flask was covered with a watch glass. The solution was then kept on an oil bath (96 °C) for five days without stirring. Dark-red crystals of (NH<sub>4</sub>)<sub>2</sub>Mo<sub>3</sub>S<sub>13</sub>·xH<sub>2</sub>O precipitated and were removed by filtering, followed by washing successively with water and ethanol. To remove excess sulfur, the (NH<sub>4</sub>)<sub>2</sub>Mo<sub>3</sub>S<sub>13</sub>·xH<sub>2</sub>O crystals were first heated in hot toluene (80 °C) for 2-4 h followed washed by dimethylsulfoxide (DMSO) for several times. Finally, the crystals were dried in air and stored in darkness.

#### Colloidal MoS<sub>2</sub> nanoparticles

Colloidal MoS<sub>2</sub> nanoparticles were prepared by a simple solvothermal method according to the reported procedure in literature.<sup>S1</sup> In brief, (NH<sub>4</sub>)<sub>2</sub>MoS<sub>4</sub> (12.5 μmol) was dissolved in methanol (25 mL) containing N<sub>2</sub>H<sub>4</sub>H<sub>2</sub>O (50%, 0.1 mL) and an appropriate amount of poly(vinylpyrrolidone) (PVP, K30). The molar ratio of PVP (monomeric unit) to MoS<sub>2</sub> is 20. The solution was added to a Teflon-lined stainless steel autoclave with a capacity of 50 mL and then heated at 423 K for 3 h to obtain the colloidal MoS<sub>2</sub>. The as-prepared colloidal MoS<sub>2</sub> was directly used for following photocatalytic hydrogen evolution reaction without further treatment.

[S1] X. Zong, Y. Na, F. Wen, G. Ma, J. Yang, D. Wang, Y. Ma, M. Wang, L. Sun and C. Li, *Chem Commun.*, 2009, **30**, 4536.

### 1.2 Characterization

X-ray diffraction (XRD) patterns were investigated with a Rigaku B/Max-RB diffractometer with a nickel filtrated Cu K $\alpha$  radiation. X-ray photoelectron spectroscopy (XPS) measurements of the samples were performed on a K-Alpha surface analysis (Thermo Scientific) using X-ray monochromatization. Ultraviolet-visible (UV-vis) transmission spectroscopy was performed using a Shimadzu UV-

1800 spectrophotometer. Photoluminescence spectra were determined by a Horiba Scientific FluoroMax-4 spectrofluorometer. The fluorescence decay times were measured using the Horiba Jobin Yvon Data Station HUB operating in time-correlated single photon counting mode (TCSPC) with the time resolution of 200 ps. Nano LED diode emitting pulses at 370 nm with 1 MHz repetition rate was used as an excitation source. Light-scattering Ludox solution was used to obtain the instrument response function (prompt). The time ranges are 0.055 ns/channel in 4096 effective channels. Horiba Jobin Yvon DAS6 fluorescence decay analysis software was used to fit the model functions to the experimental data.

### 1.3 Electrocatalytic hydrogen evolution reactions

The electrochemical measurements were carried out in a standard three-electrode electrochemical set-up using a CHI660E potentiostat. The saturated Ag/AgCl and graphite rod were used as reference electrode and counter electrode, respectively. The working electrodes were prepared by drop-casting  $[\text{Mo}_3\text{S}_{13}]^{2-}/\text{CH}_3\text{CN}$  solution onto the carbon paper (HESEN, HCP030P, thickness, 0.3 mm). Carbon paper were electrochemically active at 1.65 V vs. Ag/AgCl for 2 min in a phosphate buffer (pH 7) prior to the  $[\text{Mo}_3\text{S}_{13}]^{2-}$  deposition.<sup>S2</sup> The loading amount of  $[\text{Mo}_3\text{S}_{13}]^{2-}$  on carbon paper was controlled to be 10 nmol  $\text{cm}^{-2}$ . The electrocatalytic activity of  $[\text{Mo}_3\text{S}_{13}]^{2-}$  towards HER was examined by obtaining polarization curves using linear sweep voltammetry (LSV) at a scan rate of 1  $\text{mV s}^{-1}$  in a 0.5 M  $\text{H}_2\text{SO}_4$  solution. All the applied potentials are reported as reversible hydrogen electrode potential scale using  $E$  (vs. RHE) =  $E$  (vs. Ag/AgCl) + 0.2142 V after IR correction. Potentiostatic EIS was used to determine the uncompensated solution resistance ( $R_s$ ). The reference electrode was calibrated with a Pt wire as the working electrode for the reversible hydrogen potential in the electrolyte solution purged with  $\text{N}_2$  for 30 min and saturated high purity  $\text{H}_2$  prior to the measurements.<sup>S3</sup>

[S2]. J. Kibsgaard, T. F. Jaramillo and F. Besenbacher, *Nat. Chem.*, 2014, **6**, 248.

[S3]. X. L. Yang, A.-Y. Lu, Y. H. Zhu, M. N. Hedhili, S. X. Min, K.-W. Huang, Y. Han and L.-J. Li *Nano Energy* 2015, **15**, 634.

### 1.4 Photocatalytic hydrogen evolution reactions

The photocatalytic hydrogen production experiments were performed in a sealed Pyrex reactor (250 mL) with a top flat quartz window for light irradiation and a silicone rubber septum was fixed on its side for sampling produced H<sub>2</sub> in the headspace of reaction cell. A 300 W Xe lamp (CEL-HXF300) equipped with an optical 420 nm cut-off filter was used as light source. In a typical experiment, Ru(bpy)<sub>3</sub>Cl<sub>2</sub> and the [Mo<sub>3</sub>S<sub>13</sub>]<sup>2-</sup> catalyst were added to a mixed solution of CH<sub>3</sub>CN/H<sub>2</sub>O (9/1) containing 100 mM H<sub>2</sub>A with magnetic stirring. Before irradiation, the reaction system was thoroughly degassed by evacuation. The reaction solution was continuously stirred and maintained at 304 K by a flow of cooling ethanol. The amount of evolved H<sub>2</sub> was determined using a gas chromatograph (Tech comp; GC-7890II) with a thermal conductivity detector, a 5 Å molecular sieve column, and with N<sub>2</sub> as carrying gas.

## 2. Additional figures

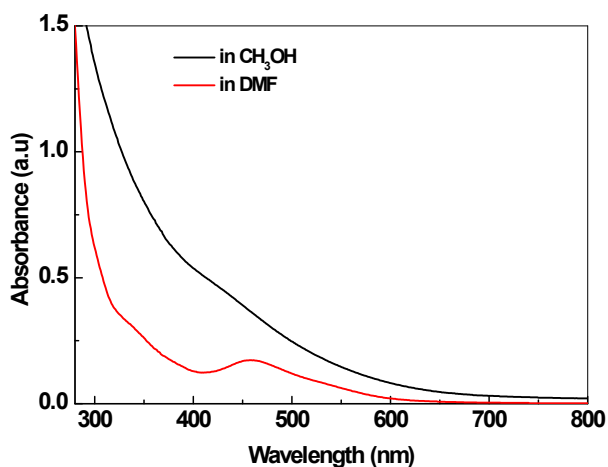

**Fig. S1** UV-vis absorption spectra of [Mo<sub>3</sub>S<sub>13</sub>]<sup>2-</sup> (10 μM) in methanol and DMF.

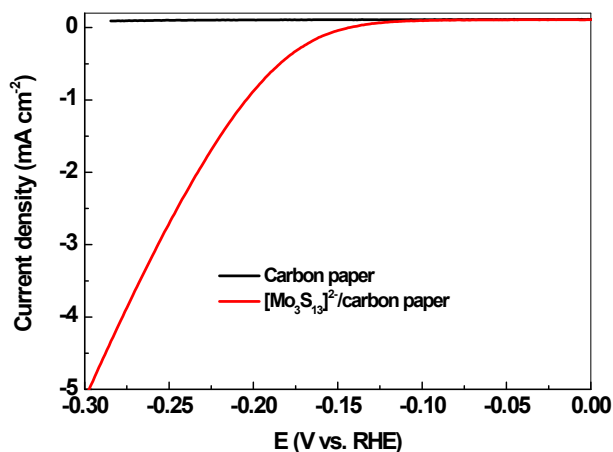

**Fig. S2** The polarization curves for the  $[\text{Mo}_3\text{S}_{13}]^{2-}$  deposited on carbon paper. The present current is normalized by the geometrical area of carbon paper and the potential is measured after internal resistance correction.

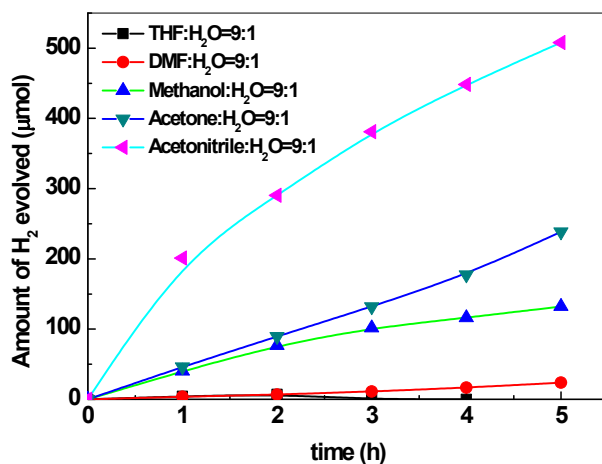

**Fig. S3** Time courses of photocatalytic  $\text{H}_2$  evolution from a mixed solution of organic solvent and  $\text{H}_2\text{O}$  (100 mL, 9:1) containing  $[\text{Mo}_3\text{S}_{13}]^{2-}$  (10  $\mu\text{M}$ ),  $\text{Ru}(\text{bpy})_3\text{Cl}_2$  (100  $\mu\text{M}$ ), and  $\text{H}_2\text{A}$  (100 mM). Light source, Xe lamp (300 W) with a cut-off filter of 420 nm.

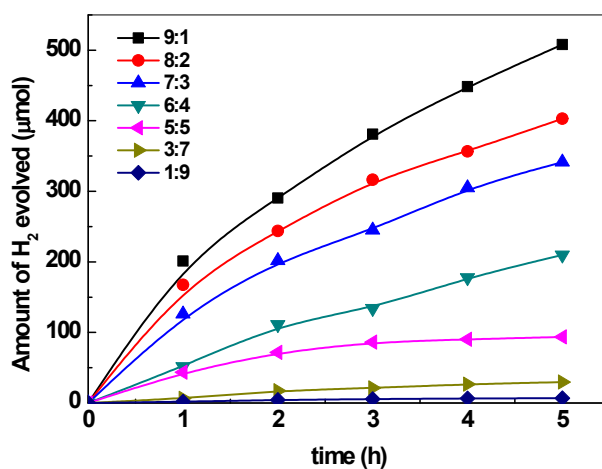

**Fig. S4** Time courses of photocatalytic  $\text{H}_2$  evolution from a mixed solution of  $\text{CH}_3\text{CN}$  and  $\text{H}_2\text{O}$  (100 mL) with different volume ratio of  $\text{CH}_3\text{CN}$  to  $\text{H}_2\text{O}$  containing  $[\text{Mo}_3\text{S}_{13}]^{2-}$  (10  $\mu\text{M}$ ),  $\text{Ru}(\text{bpy})_3\text{Cl}_2$  (100  $\mu\text{M}$ ), and  $\text{H}_2\text{A}$  (100 mM). Light source, Xe lamp (300 W) with a cut-off filter of

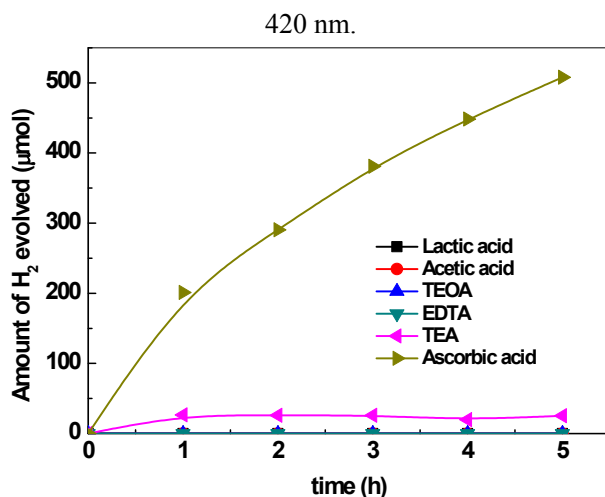

**Fig. S5** Time courses of photocatalytic H<sub>2</sub> evolution from Ru(bpy)<sub>3</sub>Cl<sub>2</sub>/[Mo<sub>3</sub>S<sub>13</sub>]<sup>2-</sup> system in the presence of different electron donors (100 mM) in CH<sub>3</sub>CN/H<sub>2</sub>O (100 mL, 9/1) solution. Conditions: [Mo<sub>3</sub>S<sub>13</sub>]<sup>2-</sup> (10 μM); Ru(bpy)<sub>3</sub>Cl<sub>2</sub> (100 μM); light source, Xe lamp (300 W) with a cut-off filter of 420 nm.

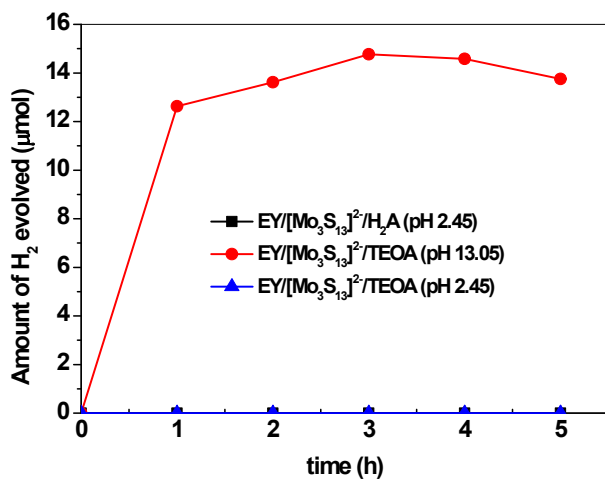

**Fig. S6** Time courses of [Mo<sub>3</sub>S<sub>13</sub>]<sup>2-</sup> catalyzed photocatalytic H<sub>2</sub> evolution from CH<sub>3</sub>CN/H<sub>2</sub>O (100 mL, 9/1) solution containing H<sub>2</sub>A or TEOA solution at different pH values as electron donor. Conditions: [Mo<sub>3</sub>S<sub>13</sub>]<sup>2-</sup> (10 μM); Ru(bpy)<sub>3</sub>Cl<sub>2</sub> (100 μM); H<sub>2</sub>A or TEOA solution, 100 mM, 100mL; light source, Xe lamp (300 W) with a cut-off filter of 420 nm.

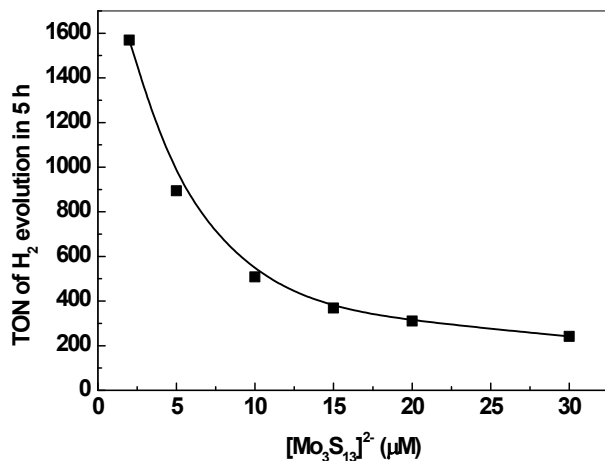

**Fig. S7** TON of H<sub>2</sub> evolution from Ru(bpy)<sub>3</sub>Cl<sub>2</sub>/[Mo<sub>3</sub>S<sub>13</sub>]<sup>2-</sup> system in CH<sub>3</sub>CN/H<sub>2</sub>O (100 mL, 9/1) solution containing 100 mM H<sub>2</sub>A. Conditions: Ru(bpy)<sub>3</sub>Cl<sub>2</sub> (100 μM); light source, Xe lamp (300 W) with a cut-off filter of 420 nm.

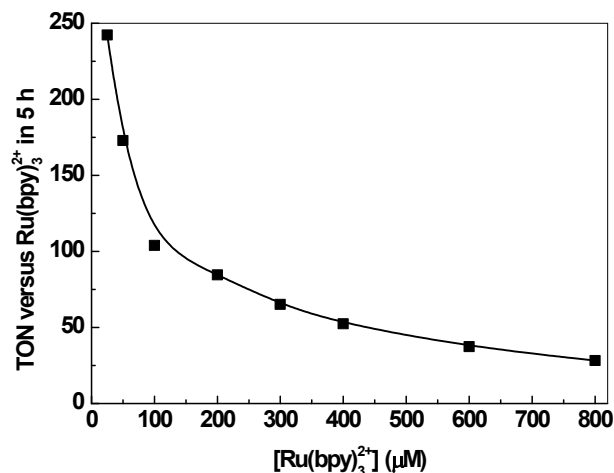

**Fig. S8** TON of H<sub>2</sub> evolution from Ru(bpy)<sub>3</sub>Cl<sub>2</sub>/[Mo<sub>3</sub>S<sub>13</sub>]<sup>2-</sup> system in CH<sub>3</sub>CN/H<sub>2</sub>O (100 mL, 9/1) solution containing 100 mM H<sub>2</sub>A. Conditions: [Mo<sub>3</sub>S<sub>13</sub>]<sup>2-</sup> (10 μM); light source, Xe lamp (300 W) with a cut-off filter of 420 nm.

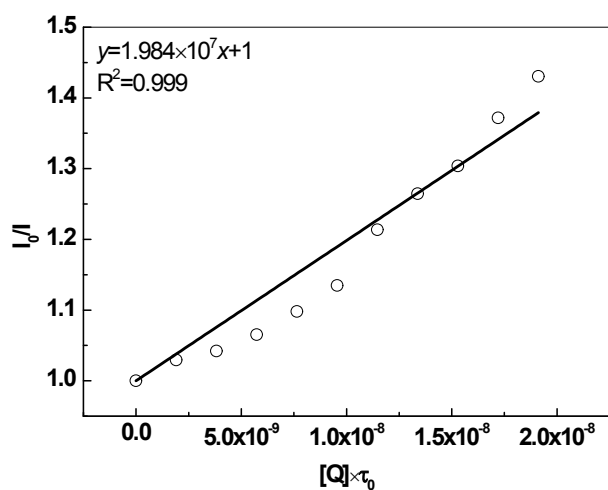

**Fig. S9** Stern-Volmer plot of the emission quenching of Ru(bpy)<sub>3</sub>Cl<sub>2</sub> solution (20 μM) by H<sub>2</sub>A in CH<sub>3</sub>CN/H<sub>2</sub>O (9/1).

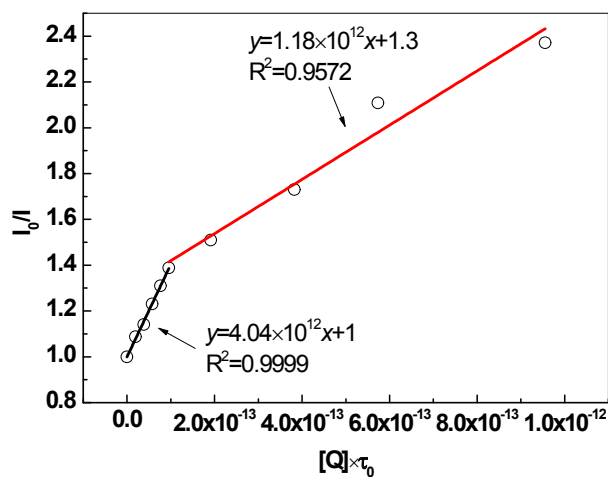

**Fig. S10** Stern-Volmer plot of the emission quenching of Ru(bpy)<sub>3</sub>Cl<sub>2</sub> solution (20 μM) by [Mo<sub>3</sub>S<sub>13</sub>]<sup>2-</sup> in CH<sub>3</sub>CN/H<sub>2</sub>O (9/1).

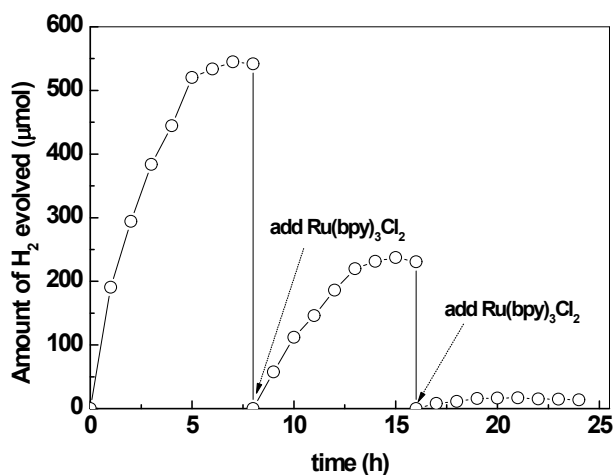

**Fig. S11** H<sub>2</sub> evolution stability from Ru(bpy)<sub>3</sub>Cl<sub>2</sub>/[Mo<sub>3</sub>S<sub>13</sub>]<sup>2-</sup> system in CH<sub>3</sub>CN/H<sub>2</sub>O (100 mL, 9/1) solution containing 100 mM H<sub>2</sub>A. Conditions: Ru(bpy)<sub>3</sub>Cl<sub>2</sub> (100 μM); [Mo<sub>3</sub>S<sub>13</sub>]<sup>2-</sup> (10 μM); light source, Xe lamp (300 W) with a cut-off filter of 420 nm.

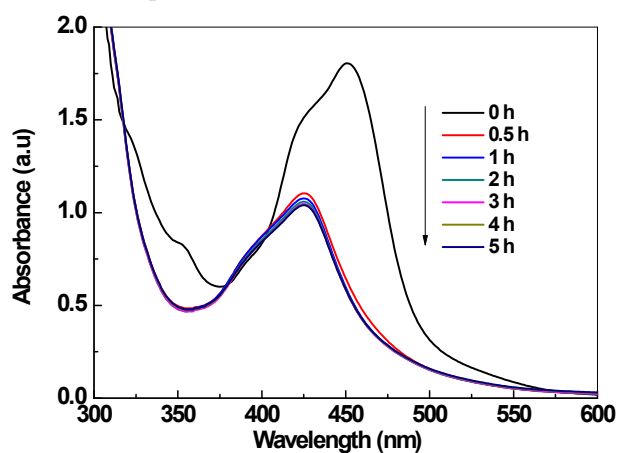

**Fig. S12** Time-dependent UV-vis absorption spectra of Ru(bpy)<sub>3</sub>Cl<sub>2</sub>-[Mo<sub>3</sub>S<sub>13</sub>]<sup>2-</sup>-H<sub>2</sub>A photocatalytic systems under light irradiation. Conditions: Ru(bpy)<sub>3</sub>Cl<sub>2</sub> (100 μM); [Mo<sub>3</sub>S<sub>13</sub>]<sup>2-</sup> (10 μM); light source, Xe lamp (300 W) with a cut-off filter of 420 nm.

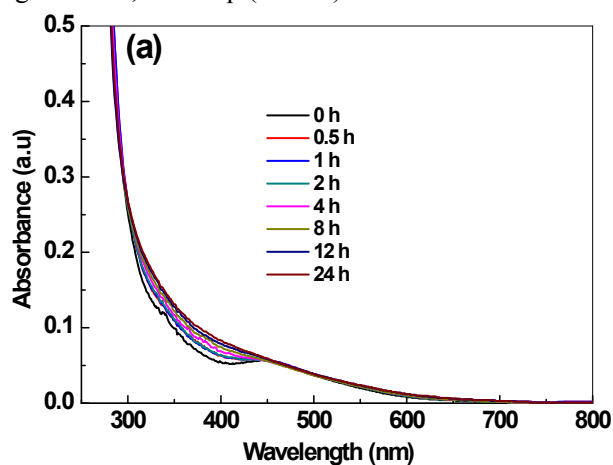



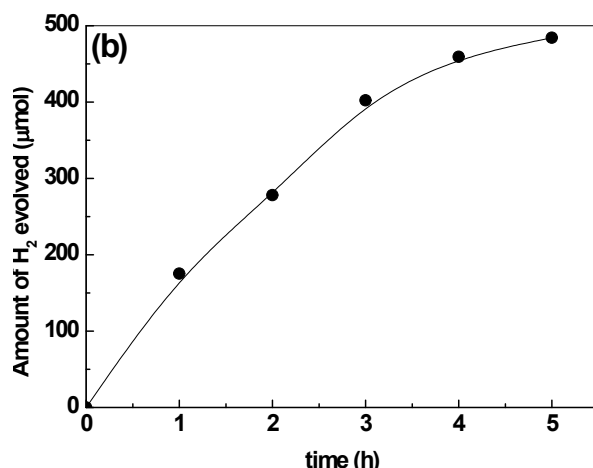

**Fig. S13** (a) UV-vis absorption spectra of  $[\text{Mo}_3\text{S}_{13}]^{2-}$  catalyst ( $10 \mu\text{M}$ ) aged in  $\text{CH}_3\text{CN}/\text{H}_2\text{O}$  (100 mL, 9/1) solution with different times. (b) Photocatalytic  $\text{H}_2$  evolution from  $\text{Ru}(\text{bpy})_3\text{Cl}_2/[\text{Mo}_3\text{S}_{13}]^{2-}$  system in  $\text{CH}_3\text{CN}/\text{H}_2\text{O}$  (100 mL, 9/1) solution containing 100 mM  $\text{H}_2\text{A}$  after the  $[\text{Mo}_3\text{S}_{13}]^{2-}$  catalyst was aged in  $\text{CH}_3\text{CN}/\text{H}_2\text{O}$  solution for 24 h in darkness. Conditions:  $\text{Ru}(\text{bpy})_3\text{Cl}_2$  (100  $\mu\text{M}$ );  $[\text{Mo}_3\text{S}_{13}]^{2-}$  ( $10 \mu\text{M}$ ); light source, Xe lamp (300 W) with a cut-off filter of 420 nm.

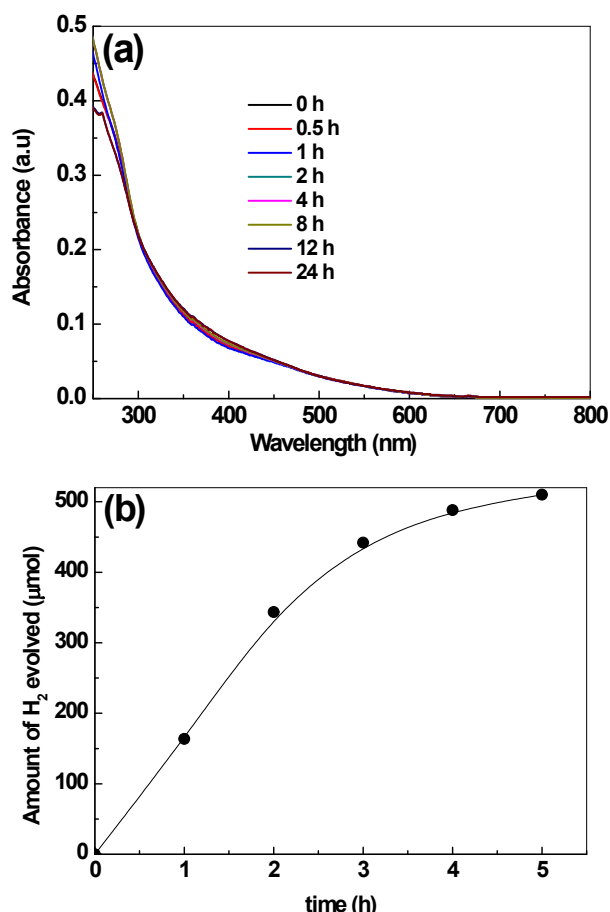

**Fig. S14** (a) UV-vis absorption spectra of  $[\text{Mo}_3\text{S}_{13}]^{2-}$  catalyst ( $10 \mu\text{M}$ ) aged in  $\text{CH}_3\text{CN}/\text{H}_2\text{O}$  (100 mL, 9/1) solution containing 100 mM  $\text{H}_2\text{A}$  with different times. (b) Photocatalytic  $\text{H}_2$  evolution from  $\text{Ru}(\text{bpy})_3\text{Cl}_2/[\text{Mo}_3\text{S}_{13}]^{2-}$  system in  $\text{CH}_3\text{CN}/\text{H}_2\text{O}$  (100 mL, 9/1) solution containing 100 mM  $\text{H}_2\text{A}$  after the  $[\text{Mo}_3\text{S}_{13}]^{2-}$  catalyst was aged in  $\text{CH}_3\text{CN}/\text{H}_2\text{O}$  solution containing  $\text{H}_2\text{A}$  for 24 h in

darkness. Conditions: Ru(bpy)<sub>3</sub>Cl<sub>2</sub> (100 μM); [Mo<sub>3</sub>S<sub>13</sub>]<sup>2-</sup> (10 μM); light source, Xe lamp (300 W) with a cut-off filter of 420 nm.
